# Supplementary material
Source: Springer Nature journal article supplement (https://www.springermedizin.de/resource/supplementary/12889_2011_3562_MOESM4_ESM.pdf/9489332)
Supplement: MOESM4 [file 9489332]

References resulting from searches n=8,274

References excluded after screening of title for relevance n=6,723

References retained for evaluation of abstracts n=1,551

References excluded after screening of abstracts for relevance and study design n=1.463

References retained for evaluation of full text n=88

References excluded after screening of full text for relevance and study design n=62

References retained for quality appraisal based on Cochrane EPOC criteria n=26

Reference tracking n=1

References excluded based on failure to meet quality criteria n=15

Studies retained for inclusion in the review n=12 (8 RCT, 2 CBA, 2 supplementary studies)
